# Supplementary material
Source: publisher figshare collection journal article supplement (https://sage.figshare.com/ndownloader/files/22366044)
Supplement: Supplementary file 1 [file 22366044]

| **Characteristics of Patients included in the longitudinal study period (n=166)** | |
| --- | --- |
| **Sex (%)** | |
| *Male* | 24 (14.5) |
| *Female* | 142 (85.5) |
| **Race (%)** | |
| *White* | 124 (74.7) |
| *Black* | 31 (18.7) |
| *Asian* | 5 (3.0) |
| *Hispanic* | 2 (1.2) |
| *Other* | 3 (1.8) |
| *Refused* | 1 (0.6) |
| **Age (years)** | |
| *Mean* | 55.9 |
| *Median* | 56 |
| *Range* | 26-85 |
| **Body mass index (kg/m2)** | |
| *Mean* | 27.9 |
| *Median* | 26.6 |
| *Range* | 14.2-49.5 |
